# Supplementary material for: Phosphorylated cellulose nanofibers exhibit exceptional capacity for uranium capture
Source: Springer Nature journal article supplement (doi:10.1007/s10570-020-02971-8), 2020-01-13
Supplement: MOESM1 [file 17563238]

## Supporting information

# Phosphorylated cellulose nanofibers exhibit exceptional capacity for uranium capture

Janika Lehtonen<sup>a</sup>, Jukka Hassinen<sup>b,\*</sup>, Avula Anil Kumar<sup>c</sup>, Roni Mäenpää<sup>b</sup>, Leena-Sisko Johansson<sup>a</sup>, Nikolaos Pahimanolis<sup>d</sup>, Thalappil Pradeep<sup>c</sup>, Olli Ikkala<sup>b</sup>, Orlando J. Rojas<sup>a,e,\*</sup>

<sup>a</sup> Department of Bioproducts and Biosystems, School of Chemical Engineering, Aalto University, P. O. Box 16300, FI-00076 Aalto, Espoo, Finland; <sup>b</sup> Department of Applied Physics, School of Science, Aalto University, P. O. Box 16300, FI-00076 Aalto, Espoo, Finland; <sup>c</sup> DST Unit of Nanoscience (DST UNS) and Thematic Unit of Excellence (TUE), Department of Chemistry, Indian Institute of Technology Madras, Chennai 600036, India; <sup>d</sup> Betulium Ltd., Tekniikantie 2, FI-02150, Espoo, Finland. <sup>e</sup> Departments of Chemical & Biological Engineering, Chemistry and, Wood Science, 2360 East Mall, The University of British Columbia, Vancouver, BC V6T 1Z3, Canada.

e-mail: [orlando.rojas@aalto.fi](mailto:orlando.rojas@aalto.fi)

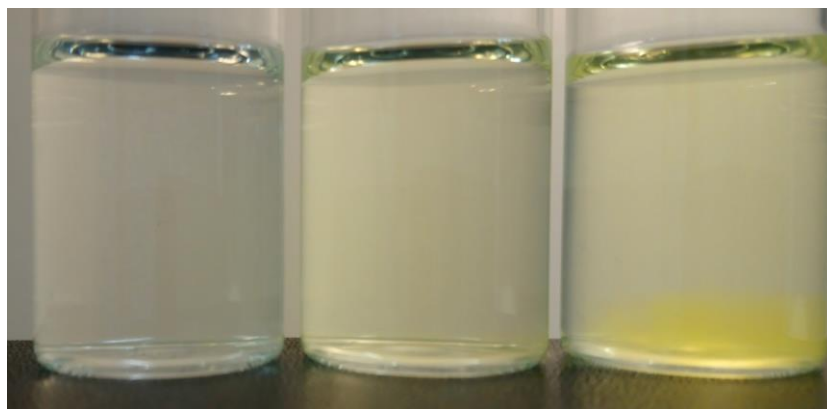

**Fig. S1.** Gelling of PHO-CNF<sub>1.00</sub> as initial uranium concentration increases. The photos were taken after 1 h contact of PHO-CNF<sub>1.00</sub> with uranium solutions of initial concentrations of 100, 300 and 500 mg/L (vials from left to right, respectively)

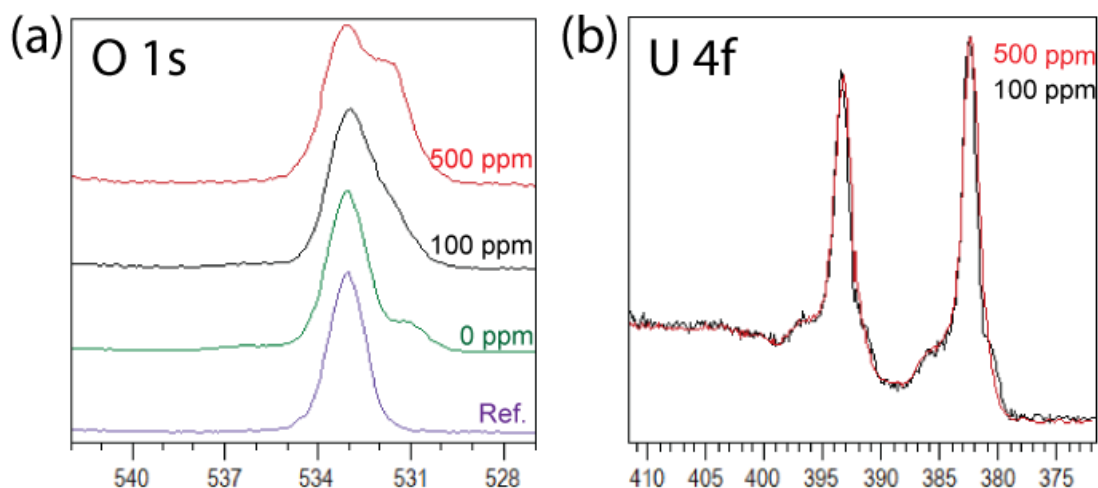

**Fig. S2.** High-resolution XPS spectra of (a) oxygen for PHO-CNF<sub>1.00</sub> samples with initial U(VI) concentrations of 0, 100 and 500 mg/L and for the in situ cellulose reference and (b) uranium for PHO-CNF<sub>1.00</sub> samples with initial U(VI) concentrations of 100 and 500 mg/L

**Table S1.** The ionic composition of water used for selectivity studies

| Ion                           | mg/L |
|-------------------------------|------|
| Cl <sup>-</sup>               | 89   |
| SO <sub>4</sub> <sup>2-</sup> | 33   |
| NO <sub>3</sub> <sup>-</sup>  | 1.8  |
| Carbonates                    | 54   |
| Na <sup>+</sup>               | 46   |
| Mg <sup>2+</sup>              | 8.3  |
| K <sup>+</sup>                | 1.2  |
| Ca <sup>2+</sup>              | 28   |

**Table S2.** Uranyl speciation with initial uranium concentration of 100 mg/L at pH 3-7

|                                                                 | pH 3              |       | pH 4              |       | pH 5              |       | pH 6              |       | pH 7              |       |
|-----------------------------------------------------------------|-------------------|-------|-------------------|-------|-------------------|-------|-------------------|-------|-------------------|-------|
|                                                                 | <i>m</i> (mol/kg) | %*    |
| (UO <sub>2</sub> ) <sub>3</sub> (OH) <sub>5</sub> <sup>+</sup>  | 1.21E-11          | 0.00  | 8.03E-07          | 0.57  | 1.04E-04          | 73.96 | 1.38E-04          | 98.60 | 1.40E-04          | 99.88 |
| (UO <sub>2</sub> ) <sub>2</sub> (OH) <sub>2</sub> <sup>+2</sup> | 4.00E-07          | 0.19  | 2.95E-05          | 14.04 | 3.39E-05          | 16.12 | 1.97E-06          | 0.94  | 8.93E-08          | 0.04  |
| UO <sub>2</sub> OH <sup>+</sup>                                 | 4.70E-07          | 0.11  | 4.07E-06          | 0.97  | 4.40E-06          | 1.05  | 1.05E-06          | 0.25  | 2.26E-07          | 0.05  |
| UO <sub>2</sub> <sup>+2</sup>                                   | 4.19E-04          | 99.69 | 3.55E-04          | 84.41 | 3.74E-05          | 8.90  | 9.19E-07          | 0.22  | 1.92E-08          | 0.00  |

\* Percent of total uranium in the indicated form

**Table S3.** Uranyl speciation in simulated drinking water at pH 6

|                                     | <i>m</i> (mol/kg) | %*    |
|-------------------------------------|-------------------|-------|
| $(\text{UO}_2)_3(\text{OH})_5^+$    | 8.40E-06          | 53.10 |
| $\text{UO}_2\text{CO}_3$            | 1.56E-05          | 32.88 |
| $\text{UO}_2(\text{CO}_3)_2^{-2}$   | 4.89E-06          | 10.31 |
| $(\text{UO}_2)_2(\text{OH})_2^{+2}$ | 3.89E-07          | 1.64  |
| $\text{UO}_2^{+2}$                  | 4.64E-07          | 0.98  |
| $\text{UO}_2\text{OH}^+$            | 4.14E-07          | 0.87  |
| $\text{UO}_2\text{SO}_4$            | 1.09E-07          | 0.23  |
| $\text{UO}_2(\text{CO}_3)_3^{-4}$   | 9.07E-09          | 0.02  |

\* Percent of total uranium in the indicated form

**Table S4.** XPS surface elemental concentrations, in at-%

| Sample  | C 1s | O 1s | U 4f <sub>7/2</sub> | Na 1s  | P 2p   | Si 2s  |
|---------|------|------|---------------------|--------|--------|--------|
| Whatman | 59.2 | 40.8 | b.d.l.              | b.d.l. | b.d.l. | b.d.l. |
| 0 ppm   | 52.8 | 41.0 | b.d.l.              | 2.5    | 3.2    | 0.6    |
| 100 ppm | 53.8 | 36.8 | 1.2                 | 1.1    | 2.5    | 4.6    |
| 500 ppm | 55.1 | 37.9 | 3.8                 | 0.3    | 1.9    | 0.9    |

**Table S5.** Langmuir, Freundlich and Sips isotherm parameters

|                   |              |        |
|-------------------|--------------|--------|
| <b>Langmuir</b>   | $q_m$ (mg/g) | 1413   |
|                   | $K_L$ (L/g)  | 0.048  |
|                   | $R^2$        | 0.972  |
| <b>Freundlich</b> | $K_F$ (mg/g) | 72.86  |
|                   | $n$          | 1.47   |
|                   | $R^2$        | 0.962  |
| <b>Sips</b>       | $q_m$ (mg/g) | 1550   |
|                   | $n$          | 1.09   |
|                   | $K_s$ (L/mg) | 0.0485 |
|                   | $R^2$        | 0.986  |
